# Supplementary material for: Multi-functional ceramic hybrid coatings on biodegradable AZ31 Mg implants: electrochemical, tribological and quantum chemical aspects for orthopaedic applications
Source: Royal Society of Chemistry journal article supplement (doi:10.1039/c4ra02363c), 2014-01-01
Supplement: c4ra02363c1.pdf [file c4ra02363c1.pdf]

# **Multi-Functional Ceramic Hybrid Coatings on Biodegradable AZ31 Mg Implants: Electrochemical, Tribological and Quantum Chemical Aspects for Orthopaedic applications**

**A.Madhankumar<sup>a\*</sup>, Elangovan Thangavel<sup>b</sup>, Suresh Ramakrishna<sup>c</sup>, I.B.Obot<sup>a</sup>, Hwa Chul Jung<sup>d</sup>, Kwang Seon Shin<sup>d</sup>, Zuhair M.Gasem<sup>a</sup> Hyongbum Kim<sup>c</sup> and Dae-Eun Kim<sup>b,e\*\*</sup>**

<sup>a</sup>Center of Research Excellence in Corrosion, Research Institute, King Fahd University of Petroleum and Minerals, Dhahran - 31261 , Kingdom of Saudi Arabia.

<sup>b</sup>Center for Nano-Wear, Yonsei University, Seoul 120–749, Republic of Korea

<sup>c</sup>Graduate School of Biomedical Science and Engineering/College of Medicine, Hanyang University, Sungdong-gu, Seoul, South Korea

<sup>d</sup>Magnesium Technology Innovation center, School of Materials Science and Engineering, Seoul National University, Seoul-151-744, Republic of Korea.

<sup>e</sup>Department of Mechanical Engineering, Yonsei University, Seoul 120–749, Republic of Korea

\*Corresponding Author:

**Email:** madhankumar@kfupm.edu.sa **Phone:** +966538801789 **Fax:** +966538604818

\*\*Corresponding Author:

**Email:** kimde@yonsei.ac.kr (Dae-Eun Kim)

Figure S1 weight gain of PEO coatings without and with Ta<sub>2</sub>O<sub>5</sub> nanoparticles

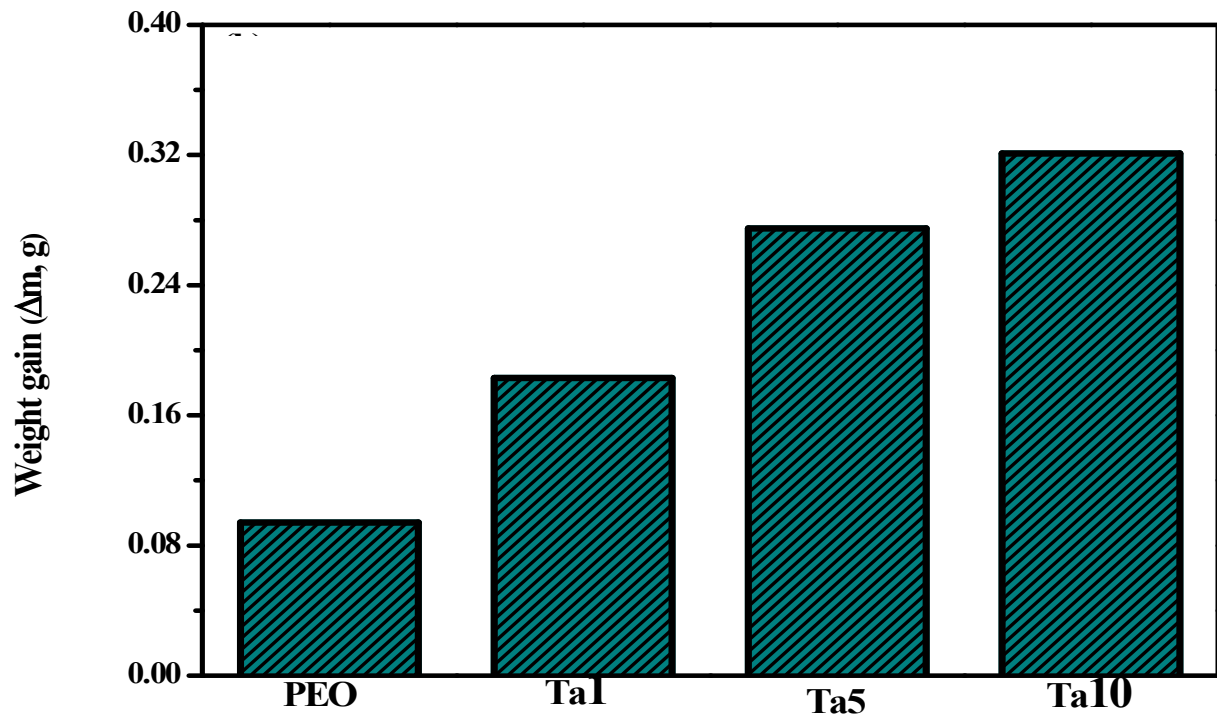

Figure S2 Relative content of MgO, Mg<sub>3</sub>(PO<sub>4</sub>)<sub>2</sub> and Ta<sub>2</sub>O<sub>5</sub> nanoparticles in PEO coating

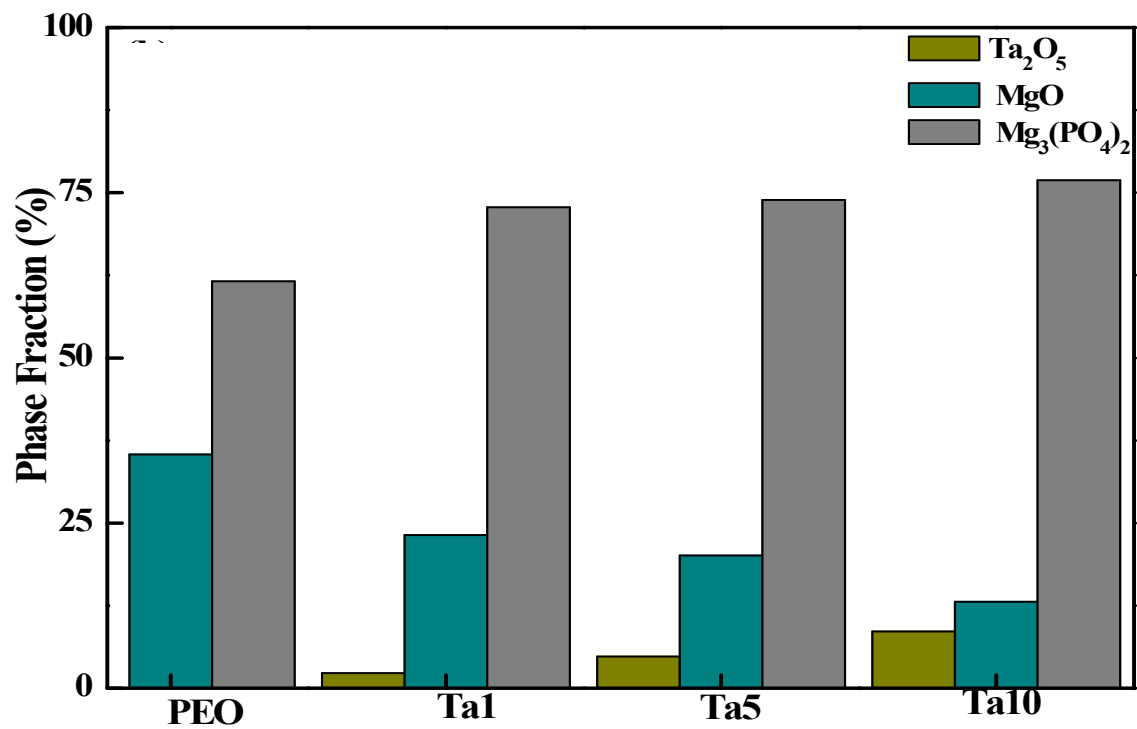

**Figure S3 SEM/EDAX mapping results of PEO coatings with Ta<sub>2</sub>O<sub>5</sub> nanoparticles**

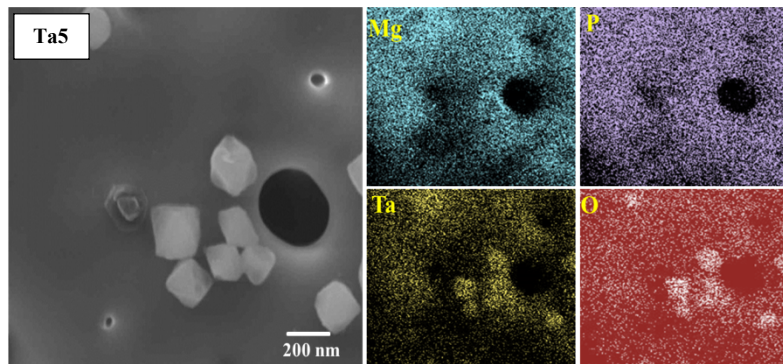

Figure S4 Equivalent circuit model for PEO coated AZ31 Mg substrates

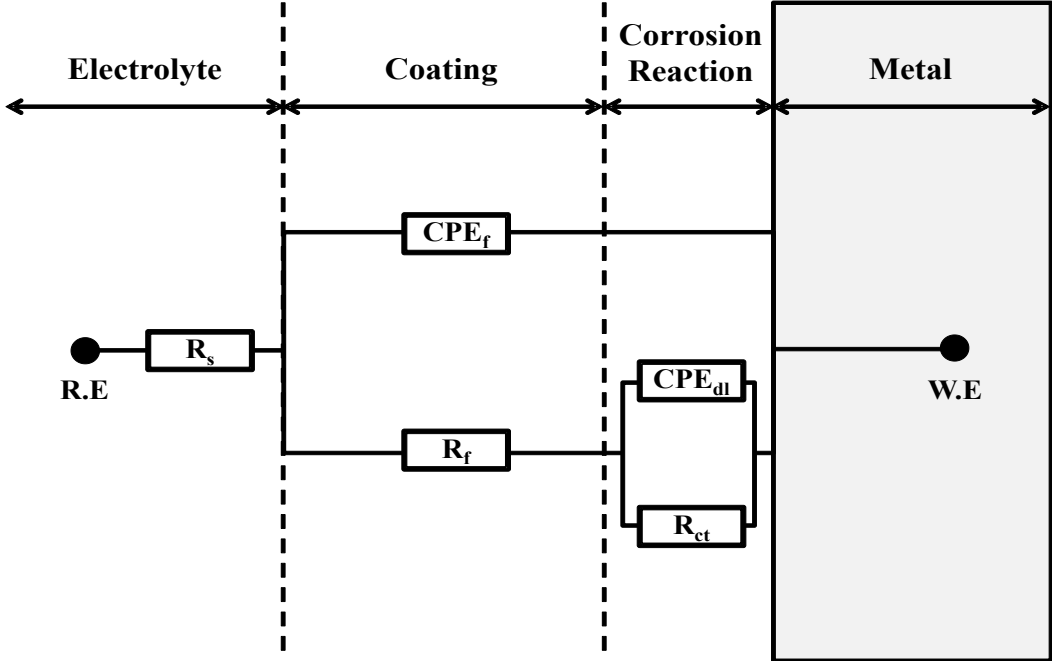

**Table S5**

| S.No. | Samples  | Hardness (HV) |       |       |       |       | Standard ( $\mu$ ) | Standard Deviation ( $\sigma$ ) | Range (R) |
|-------|----------|---------------|-------|-------|-------|-------|--------------------|---------------------------------|-----------|
|       |          | 1             | 2     | 3     | 4     | 5     |                    |                                 |           |
| 1     | Uncoated | 82.5          | 81.7  | 85.4  | 86.4  | 82.4  | 83.6               | 1.860                           | 4.7       |
| 2     | Pure PEO | 254.3         | 265.4 | 250.6 | 260   | 262.4 | 258.5              | 5.387                           | 14.8      |
| 3     | Ta1      | 300.1         | 304.2 | 306.4 | 308.4 | 306.5 | 305.1              | 2.840                           | 8.3       |
| 4     | Ta5      | 342.6         | 364.3 | 357.6 | 348.8 | 355.2 | 353.7              | 7.446                           | 21.7      |
| 5     | Ta10     | 378.5         | 368.4 | 372.9 | 365.4 | 387.4 | 374.5              | 7.810                           | 22        |
